# Supplementary material
Source: publisher figshare collection journal article supplement (https://acs.figshare.com/ndownloader/files/25634125)
Supplement: Supplementary file 1 [file 25634125]

# Supporting Information

## **Reconfigurable pinwheel artificial-spin-ice and superconductor hybrid device**

*Yang-Yang Lyu<sup>1,2,+</sup>, Xiaoyu Ma<sup>3,+</sup>, Jing Xu<sup>4</sup>, Yong-Lei Wang<sup>1,\*</sup>, Zhi-Li Xiao<sup>2,5,\*</sup>, Sining*

*Dong<sup>1</sup>, Boldizsar Janko<sup>3</sup>, Huabing Wang<sup>1,6,\*</sup>, Ralu Divan<sup>4</sup>, John E. Pearson<sup>2</sup>, Peiheng*

*Wu<sup>1</sup> and Wai-Kwong Kwok<sup>2</sup>*

<sup>1</sup> Research Institute of Superconductor Electronics, School of Electronic Science and Engineering, Nanjing University, Nanjing, China

<sup>2</sup> Materials Science Division, Argonne National Laboratory, Argonne, IL, USA

<sup>3</sup> Department of Physics, University of Notre Dame, Notre Dame, IN, USA

<sup>4</sup> Center for Nanoscale Materials, Argonne National Laboratory, Argonne, IL, USA

<sup>5</sup> Department of Physics, Northern Illinois University, DeKalb, IL, USA

<sup>6</sup> Purple Mountain Laboratories, Nanjing, China

+ Authors contribute equally

\* Correspondence to: [yongleiwang@nju.edu.cn](mailto:yongleiwang@nju.edu.cn); [xiao@anl.gov](mailto:xiao@anl.gov); [hbwang@nju.edu.cn](mailto:hbwang@nju.edu.cn)

### Calculation of vertex density and first matching field $B_0$ :

Superconducting vortices are quantized magnetic flux, each contains a flux quantum of  $\Phi_0 = 2.0 \times 10^{-15}$  Wb. At a vortex density  $n$ , the total flux in a given area  $A$  is  $\Phi_{\text{total}} = (n \times A) \times \Phi_0$ , where  $(n \times A)$  is the total number of vortices in area  $A$ . Since  $\Phi_{\text{total}} = B \times A$ , the vortex density  $n$  is directly proportional to the applied magnetic field  $B$ . Thus, the vortex density can be easily obtained by  $n = B / \Phi_0$ . In this experiment, one square unit with a lattice constant  $l = 500$  nm in the pinwheel artificial spin ice contains two nanomagnets. When  $(n \times A) = 2$  with  $A = l^2$ , two vortices exist in each square unit, i.e. the number of nanomagnets and vortices are equal. This corresponds to the first matching field  $B_0 = 2 \times \Phi_0 / l^2 \approx 166$  Oe, at which the density of vortices equals that of nanomagnets. This calculated value is consistent with our experimental result very well.

**Figure S1.** MD simulations of the distribution of vortices. (a) and (b) Distributions of vortices at  $B=0.5B_0$  and  $B=B_0$ , respectively. Black dots represent vortices. Blue and red circles are attractive and repulsive potential centers, respectively.

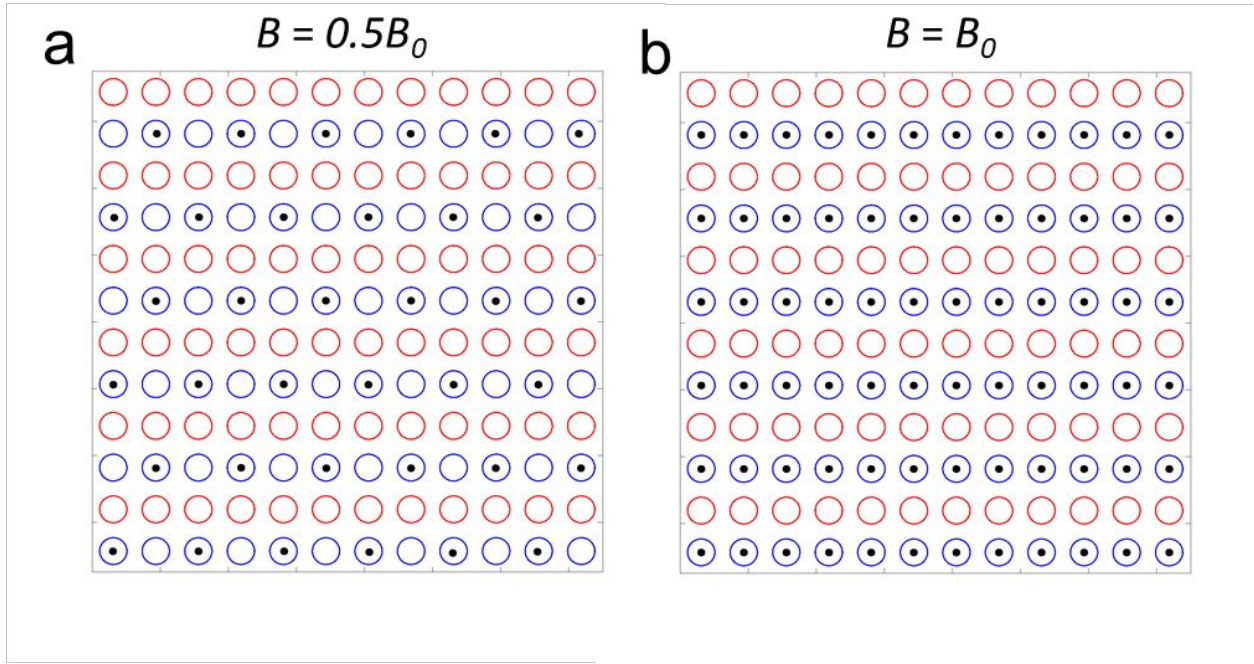

**Figure S2.** Longitudinal voltages for Section B. (a) and (b) Magnetic field and current dependences of the longitudinal voltages corresponding to the magnetic charge configurations shown in Figures 2c and 2d, respectively. The color scale is for the values of the  $\log|V|$ . The black dashed lines indicate the critical currents defined by a voltage criterion of 1  $\mu\text{V}$ . The magnetic field is in units of  $B_0=165.6$  Oe, corresponding to one vortex per nanomagnet.

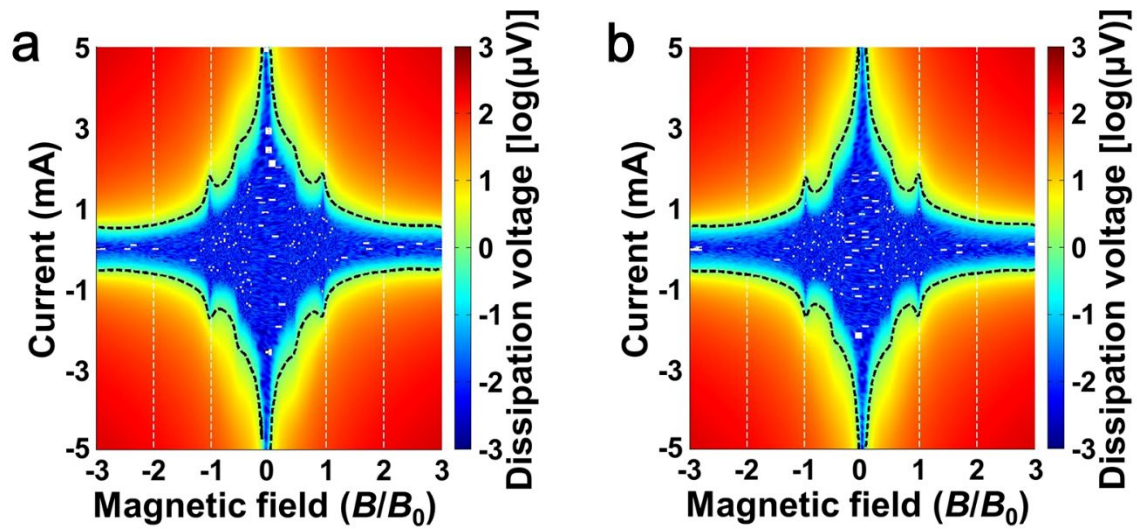

**Video 1.** Results of MD simulations for vortex motion in Section A at  $B=0.5B_0$ . Black dots represent vortices. Blue and red spots represent attractive and repulsive potential centers, respectively. The current induced driving force is up in both panels.

**Video 2.** Results of MD simulations for vortex motion in Section A at  $B=2B_0$ . Black dots represent vortices. Blue and red spots represent attractive and repulsive potential centers, respectively. The current induced driving force is up in both panels.

**Video 3.** Results of MD simulations for vortex motion in Section B at  $B=0.5B_0$ . Black dots represent vortices. Blue and red spots represent attractive and repulsive potential centers, respectively. The current induced driving force is up in both panels.

**Video 4.** Results of MD simulations for vortex motion in Section B at  $B=2B_0$ . Black dots represent vortices. Blue and red spots represent attractive and repulsive potential centers, respectively. The current induced driving force is up in both panels.
